# Supplementary material for: Ecophylogenetics Clarifies the Evolutionary Association between Mammals and Their Gut Microbiota
Source: PubMed Central journal article supplement (PMC6134092; doi:10.1128/mbio.01348-18), 2018-09-11

SF3A

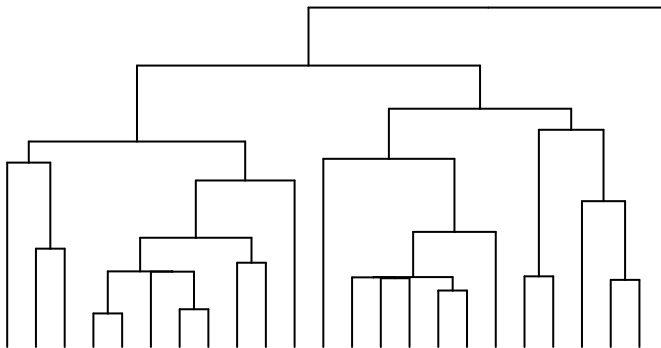

*Macropus\_rufus*  
*Loxodonta\_africana*  
*Procavia\_capensis\_2*  
*Procavia\_capensis\_1*  
*Tolypeutes\_matacus*  
*Crocuta\_crocuta*  
*Panthera\_leo\_2*  
*Panthera\_leo\_1*  
*Speothos\_venaticus*  
*Tremarctos\_ornatus*  
*Ursus\_americanus*  
*Ursus\_maritimus*  
*Equus\_caballus*  
*Equus\_grevyi*  
*Diceros\_bicornis*  
*Sus\_cebifrons*  
*Okapia\_johnstoni\_2*  
*Okapia\_johnstoni\_1*  
*Giraffa\_camelopardalis*  
*Gazella\_spekei*  
*Antidorcas\_marsupialis*  
*Ovis\_canadensis\_2*  
*Ovis\_canadensis\_1*  
*Ovis\_vignei*  
*Lemur\_catta*  
*Eulemur\_macaco*  
*Callimico\_goeldii*  
*Pithecia\_pithecia*  
*Pongo\_pygmaeus*  
*Pan\_troglodytes\_2*  
*Pan\_troglodytes\_1*  
*Gorilla\_gorilla*  
*Colobus\_guereza*  
*Papio\_hamadryas\_2*  
*Papio\_hamadryas\_1*  
*Oryctolagus\_cuniculus*  
*Callosciurus\_prevostii*  
*Hydrochaeris\_hydrochaeris*

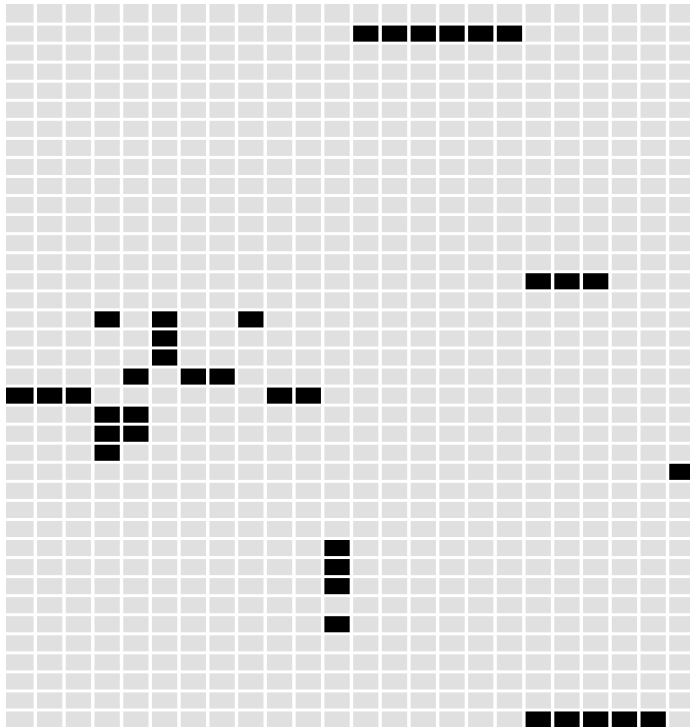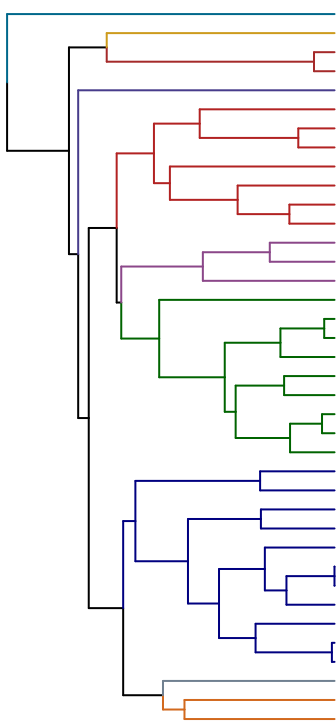

SF3B

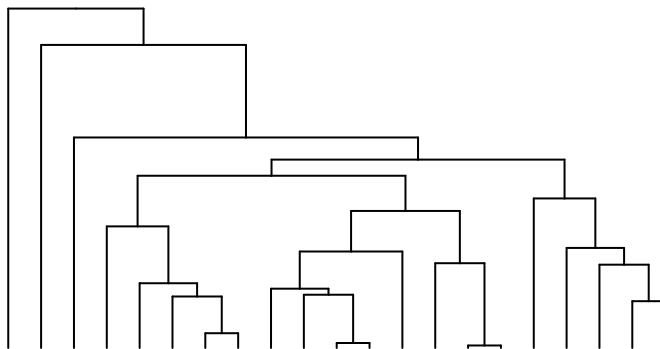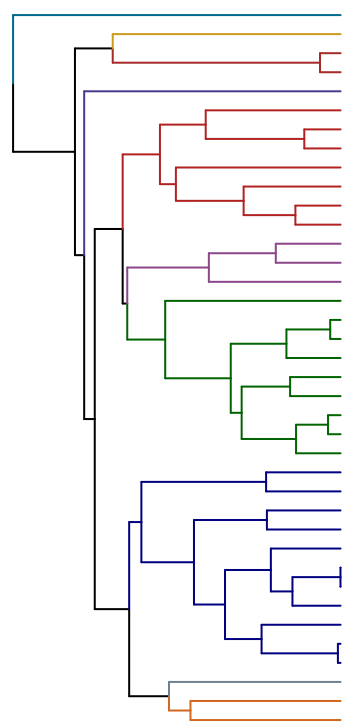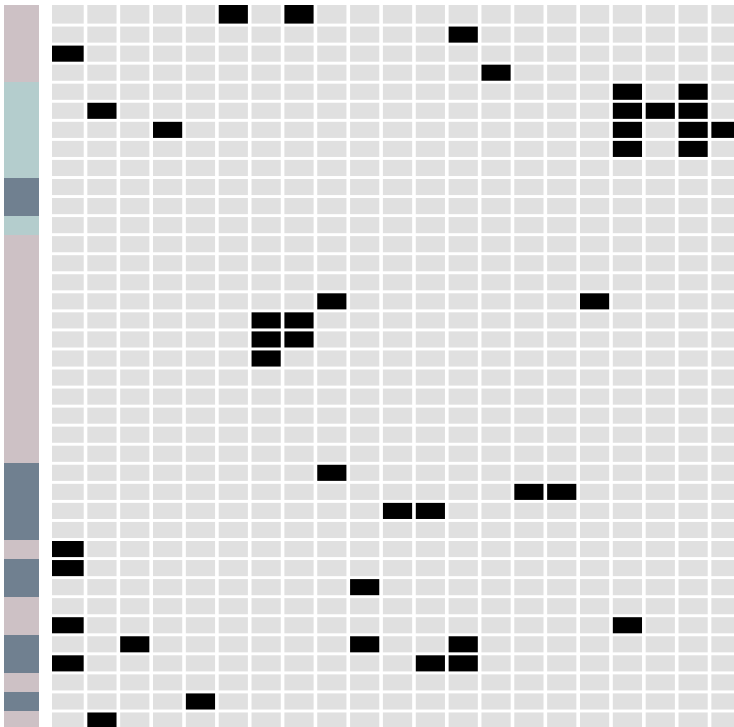

Macropus\_rufus  
Loxodonta\_africana  
Procavia\_capensis\_2  
Procavia\_capensis\_1  
Tolypeutes\_matacus  
Crocuta\_crocuta  
Panthera\_leo\_2  
Panthera\_leo\_1  
Speothos\_venaticus  
Tremarctos\_ornatus  
Ursus\_americanus  
Ursus\_maritimus  
Equus\_caballus  
Equus\_grevyi  
Diceros\_bicornis  
Sus\_cebifrons  
Okapia\_johnstoni\_2  
Okapia\_johnstoni\_1  
Giraffa\_camelopardalis  
Gazella\_spekei  
Antidorcas\_marsupialis  
Ovis\_canadensis\_2  
Ovis\_canadensis\_1  
Ovis\_vignei  
Lemur\_catta  
Eulemur\_macaco  
Callimico\_goeldii  
Pithecia\_pithecia  
Pongo\_pygmaeus  
Pan\_troglodytes\_2  
Pan\_troglodytes\_1  
Gorilla\_gorilla  
Colobus\_guereza  
Papio\_hamadryas\_2  
Papio\_hamadryas\_1  
Oryctolagus\_cuniculus  
Callosciurus\_prevostii  
Hydrochaeris\_hydrochaeris

SF3C

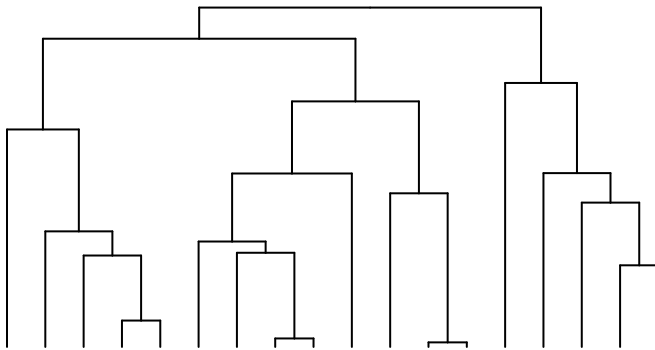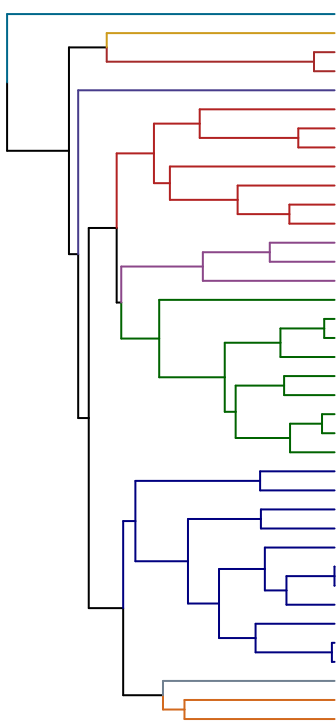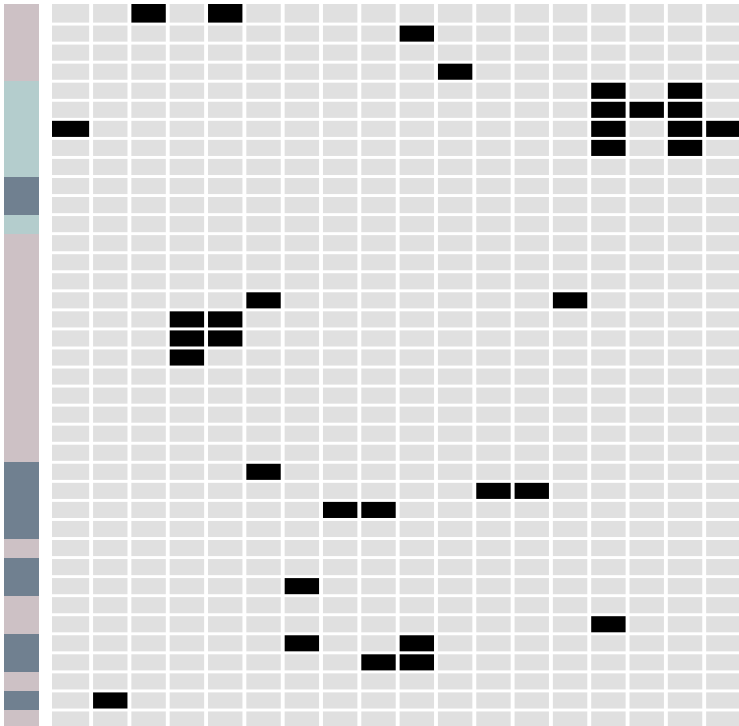

- Macropus\_rufus
- Loxodonta\_africana
- Procavia\_capensis\_2
- Procavia\_capensis\_1
- Tolypeutes\_matacus
- Crocota\_crocota
- Panthera\_leo\_2
- Panthera\_leo\_1
- Speothos\_venaticus
- Tremarctos\_ornatus
- Ursus\_americanus
- Ursus\_maritimus
- Equus\_caballus
- Equus\_grevyi
- Diceros\_bicornis
- Sus\_cebifrons
- Okapia\_johnstoni\_2
- Okapia\_johnstoni\_1
- Giraffa\_camelopardalis
- Gazella\_spekei
- Antidorcas\_marsupialis
- Ovis\_canadensis\_2
- Ovis\_canadensis\_1
- Ovis\_vignei
- Lemur\_catta
- Eulemur\_macaco
- Callimico\_goeldii
- Pithecia\_pithecia
- Pongo\_pygmaeus
- Pan\_troglodytes\_2
- Pan\_troglodytes\_1
- Gorilla\_gorilla
- Colobus\_guereza
- Papio\_hamadryas\_2
- Papio\_hamadryas\_1
- Oryctolagus\_cuniculus
- Callosciurus\_prevostii
- Hydrochaeris\_hydrochaeris

SF3D

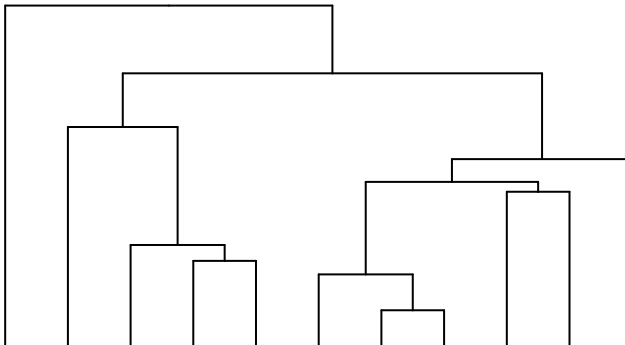

*Macropus\_rufus*  
*Loxodonta\_africana*  
*Procavia\_capensis\_2*  
*Procavia\_capensis\_1*  
*Tolypeutes\_matacus*  
*Crocota\_crocota*  
*Panthera\_leo\_2*  
*Panthera\_leo\_1*  
*Speothos\_venaticus*  
*Tremarctos\_ornatus*  
*Ursus\_americanus*  
*Ursus\_maritimus*  
*Equus\_caballus*  
*Equus\_grevyi*  
*Diceros\_bicornis*  
*Sus\_cebifrons*  
*Okapia\_johnstoni\_2*  
*Okapia\_johnstoni\_1*  
*Giraffa\_camelopardalis*  
*Gazella\_spekei*  
*Antidorcas\_marsupialis*  
*Ovis\_canadensis\_2*  
*Ovis\_canadensis\_1*  
*Ovis\_vignei*  
*Lemur\_catta*  
*Eulemur\_macaco*  
*Callimico\_goeldii*  
*Pithecia\_pithecia*  
*Pongo\_pygmaeus*  
*Pan\_troglodytes\_2*  
*Pan\_troglodytes\_1*  
*Gorilla\_gorilla*  
*Colobus\_guereza*  
*Papio\_hamadryas\_2*  
*Papio\_hamadryas\_1*  
*Oryctolagus\_cuniculus*  
*Callosciurus\_prevostii*  
*Hydrochaeris\_hydrochaeris*

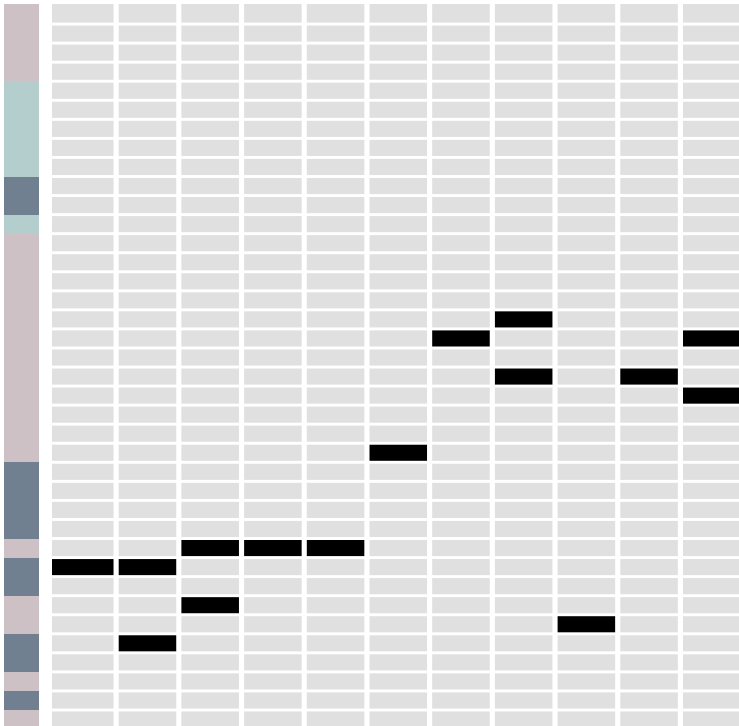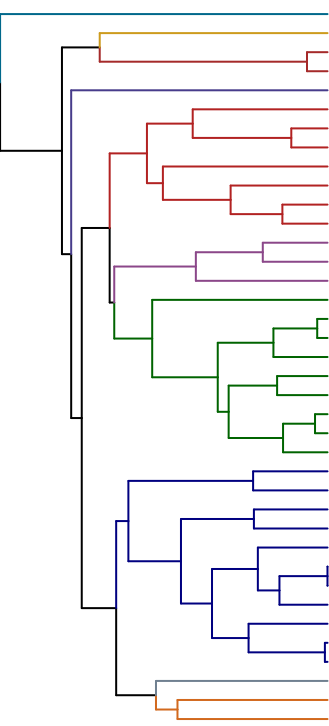

Supplement: mbo004184055sf2.pdf [file mbo004184055sf2.pdf]
